# Supplementary material for: Room-temperature mixed-solvent-vapor annealing for high performance perovskite solar cells
Source: Royal Society of Chemistry journal article supplement (doi:10.1039/c5ta08565a), 2015-11-18
Supplement: c5ta08565a1.pdf [file c5ta08565a1.pdf]

Supplementary information

**Room-temperature blend-solvents-vapor annealing for high performance perovskite solar cells**

Hao Yu<sup>1</sup>, Xiaodong Liu<sup>1</sup>, Yijun Xia<sup>1</sup>, Qingqing Dong<sup>1</sup>, Kaicheng Zhang<sup>1</sup>, Zhaowei Wang<sup>1</sup>, Yi Zhou<sup>1\*</sup>, Bo Song<sup>1\*</sup>, and Yongfang Li<sup>1,2\*</sup>

<sup>1</sup> Laboratory of Advanced Optoelectronic Materials, College of Chemistry, Chemical Engineering and Materials Science, Soochow University, Suzhou, 215123, China.

<sup>2</sup> Beijing National Laboratory for Molecular Sciences, Institute of Chemistry, Chinese Academy of Sciences, Beijing, 100190, China.

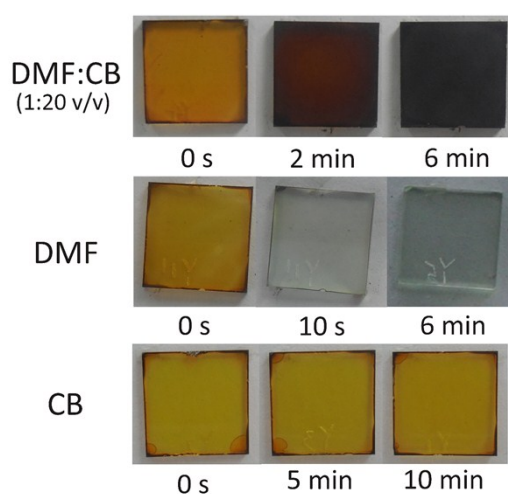

**Figure S1.** Color change of the MAPbI<sub>3-x</sub>Cl<sub>x</sub> thin films after solvent annealing at room temperature by the mixed solvents (DMF:CB = 1:20, v/v) or single solvent of DMF or CB.

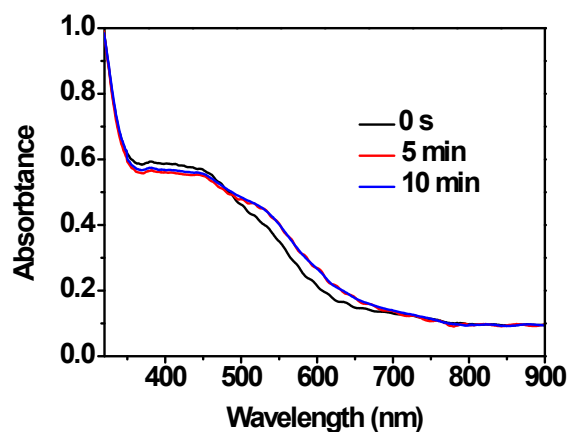

**Figure S2.** UV-vis absorption spectra of the MAPbI<sub>3-x</sub>Cl<sub>x</sub> thin films before and after CB vapor annealing at room temperature for different times.

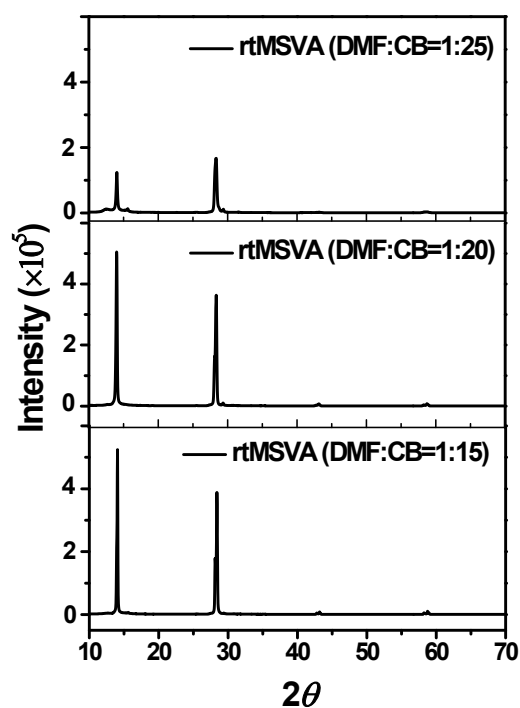

**Figure S3.** XRD patterns of the pero-TFs processed by the rtMSVA of the mixed DMF/CB solvents with different volume ratios.

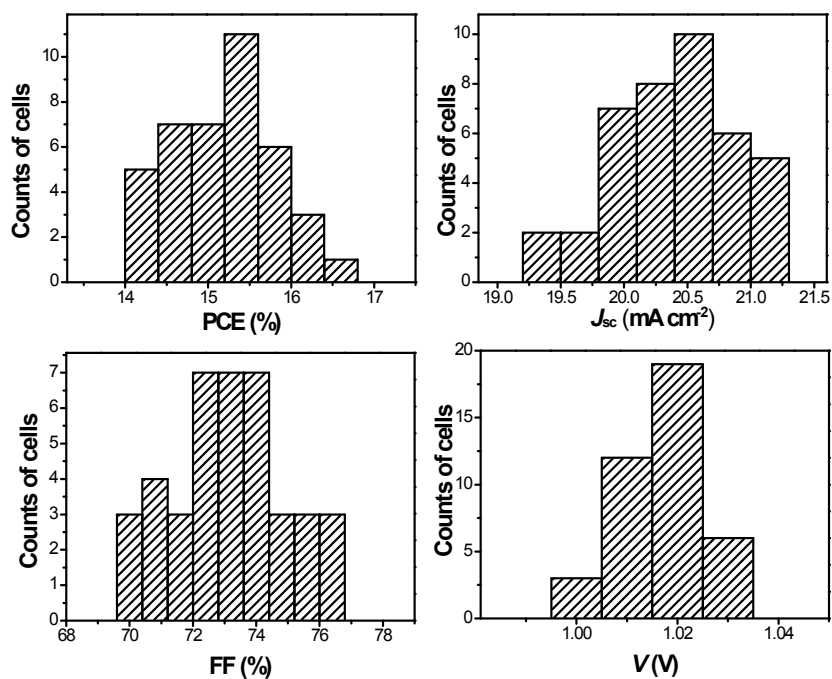

**Figure S4.** Analysis of photovoltaic performances of the pero-SCs treated by rtMSVA for 40 devices.
